# Supplementary material
Source: PubMed Central journal article supplement (PMC5785558)

**A Urinary Creatinine**

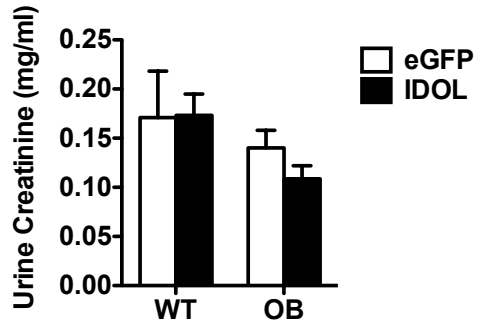

**B Urine albumin/creatinine**

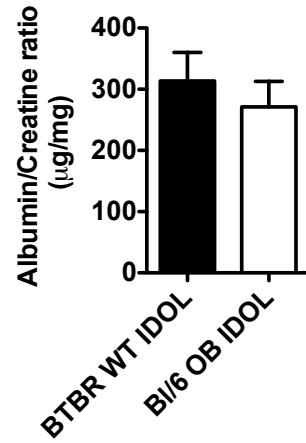

**C BUN**

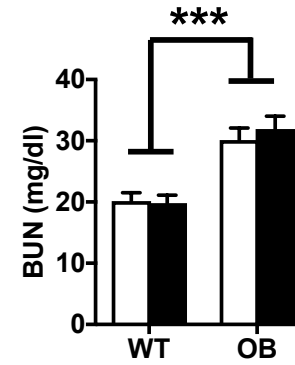

**D Cystatin C**

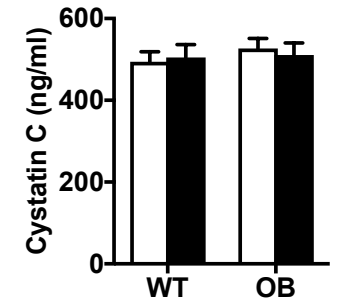

**E Glomerular size**

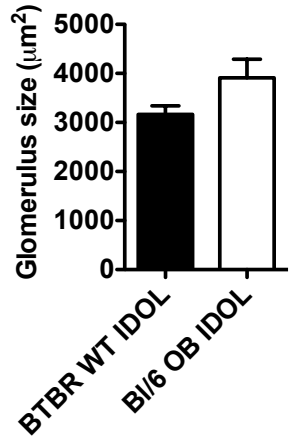

**F Glomerular PAS**

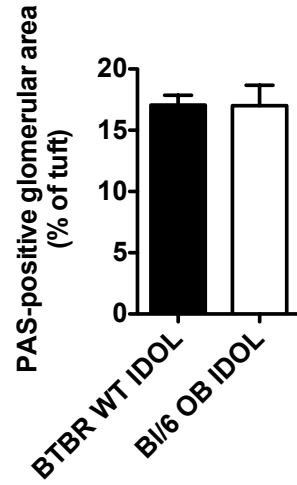

**G Silver methenamine**

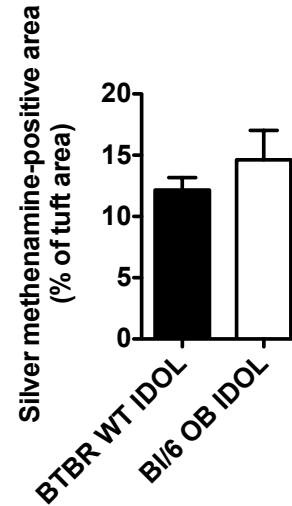

**H Glomerular Mac-2**

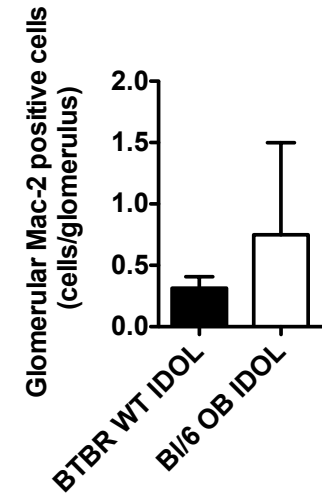

**I Silver methenamine stain**

BTBR WT IDOL

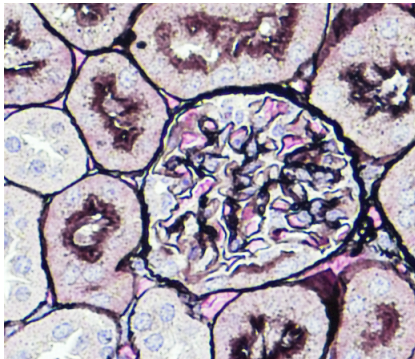

Bl/6 OB IDOL

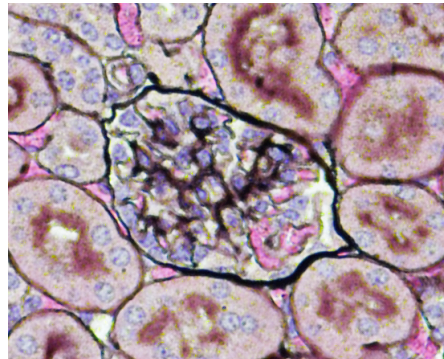

Supplement: mmc2.pdf [file mmc2.pdf]
