# Supplementary material
Source: PubMed Central journal article supplement (PMC5785558)

Liver MYLIP mRNA (human only)

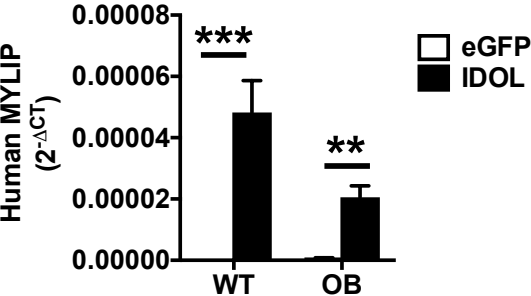

Supplement: mmc1.pdf [file mmc1.pdf]

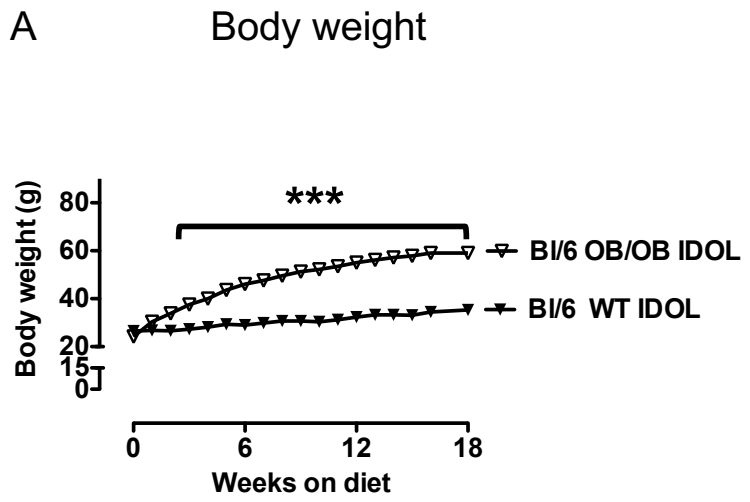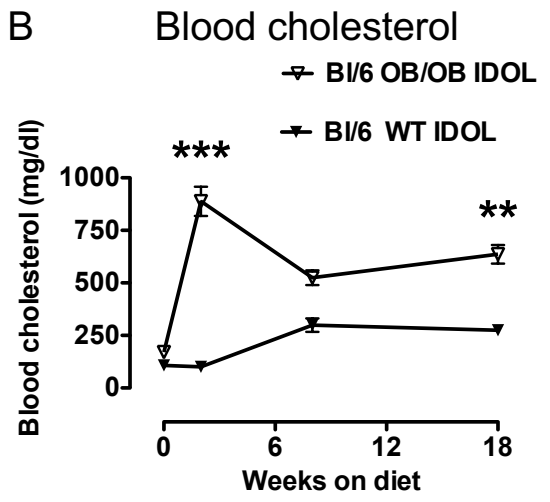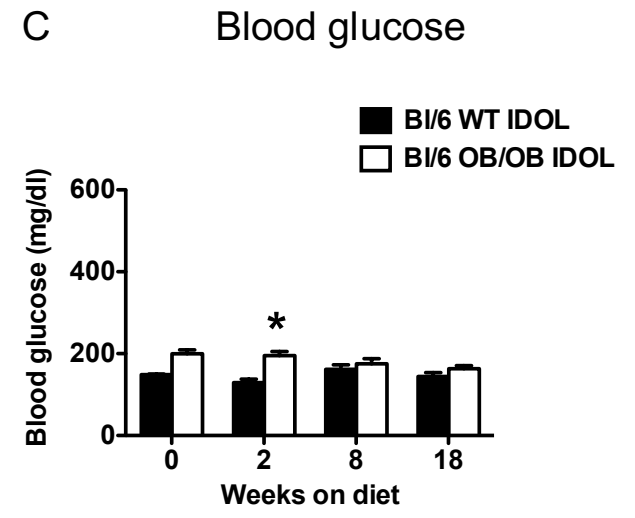

**D** Example lesion *en face*

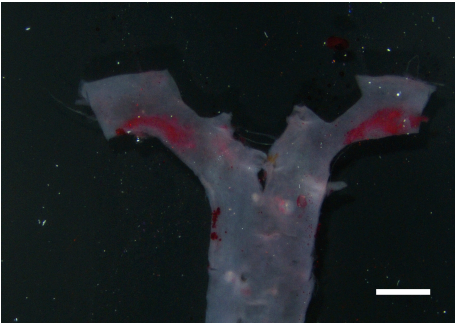

**E** Example sinus lesion

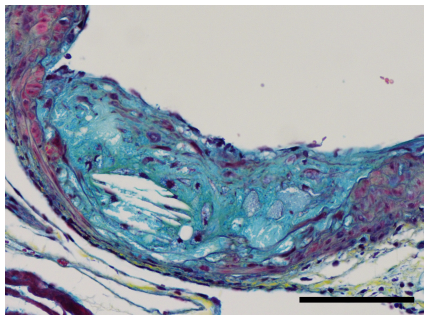

**F** *En face* atherosclerosis

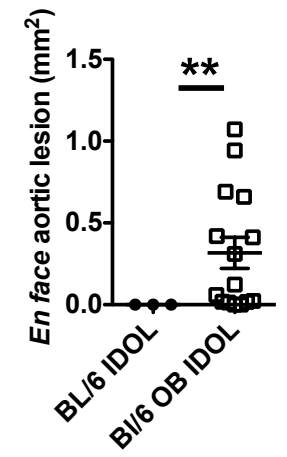

Supplement: mmc3.pdf [file mmc3.pdf]
